# Supplementary material for: Genome-wide analysis of 3′-untranslated regions supports the existence of post-transcriptional regulons controlling gene expression in trypanosomes
Source: PeerJ. 2013 Jul 30;1:e118. doi: 10.7717/peerj.118 (PMC3728762; doi:10.7717/peerj.118)
Supplement: Table S3 — KEGG genes having the motif located in the EST-seq (in blue) or not (in red). The key is within the file. [file peerj-01-118-s013.xls]

## Sheet: TableS3
Motif	GeneID	m_star	m_end	Blast Hit in trypanosome ESTdb	% identity	Alignment length	Blast E-value	q_star	q_end	Entire motif within EST-seq?
m00010	Tc00.1047053506247.330	290	319	gi|4833495|gb|AI668721.1|AI668721	99.42	171	3.3e-91	1	171	No
m00010	Tc00.1047053504163.40	312	341	gi|3392775|gb|AI069800.1|AI069800	99.14	350	0	1	350	Yes
m00020	Tc00.1047053508441.20	316	342	gi|3492594|gb|AI110479.1|AI110479	99.53	215	4e-115	1	214	No
m00020	Tc00.1047053511575.60	66	95	gi|4513870|gb|AI562525.1|AI562525	97.17	318	5e-158	35	350	Yes
m00020	Tc00.1047053506195.110	20	42	gi|3415152|gb|AI078976.1|AI078976	99.49	198	6e-105	154	350	Yes
m00020	Tc00.1047053507831.70	190	222	gi|3215232|gb|AI005722.1|AI005722	100	220	8e-123	131	350	Yes
m00020	Tc00.1047053511261.160	189	221	gi|3046137|gb|AA908065.1|AA908065	98.58	281	2e-151	70	350	Yes
m00030	Tc00.1047053509199.24	38	71	gi|4621677|gb|AI612510.1|AI612510	99.71	350	0	1	350	Yes
m00030	Tc00.1047053504163.40	195	229	gi|3392775|gb|AI069800.1|AI069800	99.14	350	0	1	350	Yes
m00051	Tc00.1047053510121.20	153	183	gi|3244349|gb|AI026523.1|AI026523	99.49	197	1e-106	1	197	Yes
m00051	Tc00.1047053504163.40	187	220	gi|3392775|gb|AI069800.1|AI069800	99.14	350	0	1	350	Yes
m00071	Tc00.1047053510645.30	31	55	gi|32151631|gb|CB964105.1|CB964105	100	217	5e-121	134	350	Yes
m00130	Tc00.1047053508535.50	97	130	gi|4826325|gb|AI667953.1|AI667953	98.17	328	1e-170	1	322	Yes
m00130	Tc00.1047053510187.30	97	131	gi|32150954|gb|CB923900.1|CB923900	99.33	297	5e-164	1	297	Yes
m00190	Tc00.1047053506839.70	200	218	gi|3392717|gb|AI069742.1|AI069742	100	240	9e-135	1	240	Yes
m00190	Tc00.1047053508717.20	201	219	gi|44917944|gb|CF888061.1|CF888061	100	210	7e-117	141	350	Yes
m00190	Tc00.1047053506295.100	84	114	gi|4826370|gb|AI667998.1|AI667998	95.28	212	5e-87	1	209	Yes
m00190	Tc00.1047053511145.60	16	29	gi|44918599|gb|CF888716.1|CF888716	95.48	221	9.1e-98	1	219	Yes
m00190	Tc00.1047053511589.10	209	240	gi|2655791|gb|AA676127.1|AA676127	97.42	349	6e-176	1	348	Yes
m00240	Tc00.1047053508601.30	240	264	gi|3258792|gb|AI035062.1|AI035062	99.42	172	8.4e-92	1	172	No
m00240	Tc00.1047053507265.30	12	43	gi|44918125|gb|CF888242.1|CF888242	100	177	3.6e-97	174	350	Yes
m00250	Tc00.1047053503899.90	1	14	gi|44919853|gb|CF889970.1|CF889970	97.46	197	3.6e-97	149	345	Yes
m00250	Tc00.1047053506529.420	16	47	gi|3392729|gb|AI069754.1|AI069754	100	255	1e-143	1	255	Yes
m00250	Tc00.1047053506529.430	16	47	gi|3392729|gb|AI069754.1|AI069754	100	203	1e-112	1	203	Yes
m00260	Tc00.1047053508741.170	119	153	gi|3392746|gb|AI069771.1|AI069771	99.26	270	7e-148	1	270	Yes
m00260	Tc00.1047053511071.140	178	216	gi|32151418|gb|CB924129.1|CB924129	99.43	350	0	1	350	Yes
m00270	Tc00.1047053508535.50	68	99	gi|4826325|gb|AI667953.1|AI667953	98.17	328	1e-170	1	322	Yes
m00270	Tc00.1047053510187.30	68	99	gi|32150954|gb|CB923900.1|CB923900	99.33	297	5e-164	1	297	Yes
m00270	Tc00.1047053508173.40	34	67	gi|4826251|gb|AI667879.1|AI667879	100	188	1e-103	1	188	Yes
m00280	Tc00.1047053508799.170	253	291	gi|6807405|gb|AW330347.1|AW330347	98.81	252	9e-135	1	252	No
m00330	Tc00.1047053510337.40	172	194	gi|32150902|gb|CB923874.1|CB923874	98.03	152	1e-72	8	159	No
m00350	Tc00.1047053508535.50	135	169	gi|4826325|gb|AI667953.1|AI667953	98.17	328	1e-170	1	322	Yes
m00350	Tc00.1047053510187.30	136	170	gi|32150954|gb|CB923900.1|CB923900	99.33	297	5e-164	1	297	Yes
m00410	Tc00.1047053510337.40	84	121	gi|32150902|gb|CB923874.1|CB923874	98.03	152	1e-72	8	159	Yes
m00480	Tc00.1047053510337.40	216	250	gi|32150902|gb|CB923874.1|CB923874	98.03	152	1e-72	8	159	No
m00480	Tc00.1047053504839.28	5	36	gi|3392857|gb|AI069882.1|AI069882	96.82	157	2.7e-73	106	262	Yes
m00480	Tc00.1047053504839.44	5	36	gi|6807039|gb|AW329920.1|AW329920	95.54	157	3.8e-66	97	253	Yes
m00500	Tc00.1047053511911.130	63	97	gi|3392785|gb|AI069810.1|AI069810	100	170	5.4e-93	1	170	Yes
m00500	Tc00.1047053510121.20	47	81	gi|3244349|gb|AI026523.1|AI026523	99.49	197	1e-106	1	197	Yes
m00520	Tc00.1047053510121.20	300	334	gi|3244349|gb|AI026523.1|AI026523	99.49	197	1e-106	1	197	No
m00520	Tc00.1047053506507.10	131	165	gi|3392726|gb|AI069751.1|AI069751	99.38	161	3.1e-85	1	161	No
m00520	Tc00.1047053510667.120	190	224	gi|3258773|gb|AI035043.1|AI035043	97.52	202	4e-100	1	202	No
m00520	Tc00.1047053511531.50	242	279	gi|4514000|gb|AI562655.1|AI562655	98	350	1e-180	1	350	Yes
m00520	Tc00.1047053511911.130	105	139	gi|3392785|gb|AI069810.1|AI069810	100	170	5.4e-93	1	170	Yes
m00520	Tc00.1047053508465.90	9	40	gi|4775680|gb|AI664692.1|AI664692	100	264	4e-149	87	350	Yes
m00561	Tc00.1047053508741.170	36	74	gi|3392746|gb|AI069771.1|AI069771	99.26	270	7e-148	1	270	Yes
m00561	Tc00.1047053504425.60	83	103	gi|3115844|gb|AA952748.1|AA952748	99.45	181	9.1e-98	1	181	Yes
m00561	Tc00.1047053511277.370	215	252	gi|4827393|gb|AI668085.1|AI668085	98.5	333	9e-169	1	330	Yes
m00563	Tc00.1047053511507.50	186	217	gi|3392669|gb|AI069694.1|AI069694	99.38	322	4e-174	2	321	Yes
m00564	Tc00.1047053511277.370	299	337	gi|4827393|gb|AI668085.1|AI668085	98.5	333	9e-169	1	330	No
m00564	Tc00.1047053511151.90	45	72	gi|3392830|gb|AI069855.1|AI069855	99.31	288	1e-158	60	347	Yes
m00620	Tc00.1047053506937.10	243	281	gi|3392594|gb|AI069619.1|AI069619	99.44	180	1.4e-96	1	180	No
m00620	Tc00.1047053507831.70	111	149	gi|3215232|gb|AI005722.1|AI005722	100	220	8e-123	131	350	Yes
m00620	Tc00.1047053511261.160	110	148	gi|3046137|gb|AA908065.1|AA908065	98.58	281	2e-151	70	350	Yes
m00620	Tc00.1047053508441.20	172	209	gi|3492594|gb|AI110479.1|AI110479	99.53	215	4e-115	1	214	Yes
m00630	Tc00.1047053506195.110	5	38	gi|3415152|gb|AI078976.1|AI078976	99.49	198	6e-105	154	350	Yes
m00630	Tc00.1047053508741.170	37	60	gi|3392746|gb|AI069771.1|AI069771	99.26	270	7e-148	1	270	Yes
m00630	Tc00.1047053511741.50	186	216	gi|3258841|gb|AI035111.1|AI035111	100	350	0	1	350	Yes
m00640	Tc00.1047053507681.20	53	96	gi|3366345|gb|AI066180.1|AI066180	100	224	3e-125	127	350	Yes
m00670	Tc00.1047053511741.50	27	54	gi|3258841|gb|AI035111.1|AI035111	100	350	0	1	350	Yes
m00670	Tc00.1047053510407.90	133	162	gi|3340683|gb|AI065276.1|AI065276	99.21	254	6e-136	96	348	Yes
m00785	Tc00.1047053510719.60	54	83	gi|298363650|gb|HO052167.1|HO052167	95.76	165	6.7e-74	186	350	Yes
m00900	Tc00.1047053508277.140	130	162	gi|4827408|gb|AI668100.1|AI668100	100	308	2e-175	1	308	Yes
m00970	Tc00.1047053511229.110	320	348	gi|2275665|gb|AA532089.1|AA532089	100	301	4e-171	5	305	No
m00970	Tc00.1047053503939.80	232	263	gi|32151158|gb|CB924002.1|CB924002	95.31	213	2.1e-92	138	350	Yes
m00970	Tc00.1047053509805.130	225	256	gi|32151158|gb|CB924002.1|CB924002	99.09	219	1e-115	134	350	Yes
m03010	Tc00.1047053504105.94	141	200	gi|4826336|gb|AI667964.1|AI667964	99.49	196	1e-103	1	196	No
m03010	Tc00.1047053509937.100	215	301	gi|32150677|gb|CB923762.1|CB923762	98.66	224	1e-118	1	224	No
m03010	Tc00.1047053510409.39	218	307	gi|32150677|gb|CB923762.1|CB923762	95.48	221	2.3e-98	1	221	No
m03010	Tc00.1047053504181.10	72	158	gi|4827370|gb|AI668062.1|AI668062	99.34	152	1.8e-77	1	151	No
m03010	Tc00.1047053510719.160	113	166	gi|44918417|gb|CF888534.1|CF888534	96.25	160	4.1e-72	1	160	No
m03010	Tc00.1047053509749.33	139	289	gi|4647938|gb|AI623013.1|AI623013	100	170	5.4e-93	1	170	No
m03010	Tc00.1047053507773.34	253	293	gi|44804544|gb|CF243386.1|CF243386	97.79	272	2e-139	19	290	No
m03010	Tc00.1047053503881.39	171	251	gi|44918226|gb|CF888343.1|CF888343	98.65	223	2e-117	1	223	No
m03010	Tc00.1047053510101.180	170	210	gi|4775728|gb|AI664740.1|AI664740	100	152	3e-82	199	350	Yes
m03010	Tc00.1047053507681.160	97	150	gi|32150817|gb|CB923831.1|CB923831	98.97	195	4e-103	1	195	Yes
m03010	Tc00.1047053509233.190	169	263	gi|44919081|gb|CF889198.1|CF889198	99.67	303	6e-170	1	303	Yes
m03010	Tc00.1047053503801.20	58	107	gi|44918219|gb|CF888336.1|CF888336	98.75	160	3e-82	1	160	Yes
m03010	Tc00.1047053507019.86	49	97	gi|44919407|gb|CF889524.1|CF889524	98.83	171	8.1e-89	180	350	Yes
m03010	Tc00.1047053508207.110	142	195	gi|44918210|gb|CF888327.1|CF888327	100	173	8.7e-95	178	350	Yes
m03010	Tc00.1047053503395.40	85	286	gi|6760954|gb|AW325033.1|AW325033	95.12	328	2e-142	1	325	Yes
m03010	Tc00.1047053506181.50	86	289	gi|6760954|gb|AW325033.1|AW325033	98.2	334	4e-174	1	334	Yes
m03010	Tc00.1047053508461.490	141	227	gi|5035167|gb|AI717911.1|AI717911	100	156	1.2e-84	195	350	Yes
m03010	Tc00.1047053511217.145	268	322	gi|32150761|gb|CB923803.1|CB923803	100	350	0	1	350	Yes
m03010	Tc00.1047053507105.40	125	250	gi|4647898|gb|AI622973.1|AI622973	96.25	160	1e-72	191	350	Yes
m03010	Tc00.1047053506595.100	15	101	gi|2327514|gb|AA556062.1|AA556062	98.35	182	5.4e-93	169	350	Yes
m03020	Tc00.1047053508601.30	297	327	gi|3258792|gb|AI035062.1|AI035062	99.42	172	8.4e-92	1	172	No
m03030	Tc00.1047053508707.210	108	139	gi|4833503|gb|AI668729.1|AI668729	98.91	184	1.4e-96	1	184	Yes
m03040	Tc00.1047053511189.80	252	272	gi|44918919|gb|CF889036.1|CF889036	99.42	171	3.3e-91	1	171	No
m03040	Tc00.1047053509965.30	51	80	gi|44917869|gb|CF887986.1|CF887986	98.97	195	2e-101	1	193	Yes
m03040	Tc00.1047053511725.174	200	232	gi|32150900|gb|CB923873.1|CB923873	99.67	299	1e-167	1	299	Yes
m03410	Tc00.1047053506287.200	39	70	gi|4621698|gb|AI612531.1|AI612531	95.42	153	3.8e-66	198	350	Yes
m03410	Tc00.1047053508881.80	39	70	gi|4621698|gb|AI612531.1|AI612531	100	241	2e-135	110	350	Yes
m03420	Tc00.1047053508881.80	19	56	gi|4621698|gb|AI612531.1|AI612531	100	241	2e-135	110	350	Yes
m03430	Tc00.1047053506287.200	41	72	gi|4621698|gb|AI612531.1|AI612531	95.42	153	3.8e-66	198	350	Yes
m03430	Tc00.1047053508881.80	39	70	gi|4621698|gb|AI612531.1|AI612531	100	241	2e-135	110	350	Yes
m03430	Tc00.1047053507265.30	142	176	gi|44918125|gb|CF888242.1|CF888242	100	177	3.6e-97	174	350	Yes
m03440	Tc00.1047053503801.30	230	253	gi|4826253|gb|AI667881.1|AI667881	96	350	8e-160	1	350	Yes
m03440	Tc00.1047053508817.50	228	251	gi|4826253|gb|AI667881.1|AI667881	100	350	0	1	350	Yes
m03440	Tc00.1047053507265.30	164	190	gi|44918125|gb|CF888242.1|CF888242	100	177	3.6e-97	174	350	Yes
m03450	Tc00.1047053506287.200	39	70	gi|4621698|gb|AI612531.1|AI612531	95.42	153	3.8e-66	198	350	Yes
m03450	Tc00.1047053508881.80	41	72	gi|4621698|gb|AI612531.1|AI612531	100	241	2e-135	110	350	Yes
m04070	Tc00.1047053507483.39	304	331	gi|44917851|gb|CF887968.1|CF887968	98.18	165	7.5e-83	1	165	No
m04130	Tc00.1047053509153.50	139	170	gi|4513797|gb|AI562452.1|AI562452	95.71	350	3e-168	1	350	Yes
m04144	Tc00.1047053508385.60	69	99	gi|3421582|gb|AI083159.1|AI083159	100	167	3.3e-91	1	167	Yes
m04650	Tc00.1047053510519.60	82	114	gi|3258900|gb|AI035170.1|AI035170	99.04	209	4e-109	1	208	Yes
m04650	Tc00.1047053510755.138	76	104	gi|44918871|gb|CF888988.1|CF888988	97.21	179	1.2e-84	1	177	Yes
KEGG genes having the motif located in the EST-seq (in blue) or not (in red).
No. of sequences with Blast hit: 107 out of 1090 (9.81%).
No. of blast seqs. with the motif in EST-seq: 84 out of 107 (78.5%).
m_star, the predicted location of the first motif's position in the 350-nt downstream sequence.
m_end, last position of the motif in the 350-nt downstream sequence.
q_star, query position of the alignment start.
q_end, query position of the alignment end.
