# Supplementary material for: Genome-wide analysis of 3′-untranslated regions supports the existence of post-transcriptional regulons controlling gene expression in trypanosomes
Source: PeerJ. 2013 Jul 30;1:e118. doi: 10.7717/peerj.118 (PMC3728762; doi:10.7717/peerj.118)
Supplement: Table S6 — Table of motif-containing genes in the T. cruzi genome. Motif name— Description— Category— Term— Count— %— PValue— Genes— List Total— Pop Hits— Pop Total— Fold Enrichm.— Bonferroni— Benjamini— FDR— In red, no-enriched targets genes. [file peerj-01-118-s016.xls]

## Sheet: TableS6
Motif name	Description	Category	Term	Count	%	PValue	Genes	List Total	Pop Hits	Pop Total	Fold Enrichm.	Bonferroni	Benjamini	FDR
m00010 *	Glycolysis / Gluconeogenesis	KEGG_PATHWAY	tcr00010:Glycolysis / Gluconeogenesis	24	1.7341	1.30454e-08	TcCLB.510105.170, TcCLB.504425.90, TcCLB.508933.20, TcCLB.504427.110, TcCLB.510421.320, TcCLB.511751.120, TcCLB.506835.70, TcCLB.510889.221, TcCLB.510187.100, TcCLB.507811.44, TcCLB.509331.30, TcCLB.506247.330, TcCLB.506945.20, TcCLB.509379.10, TcCLB.509331.180, TcCLB.509717.20, TcCLB.504105.140, TcCLB.508951.20, TcCLB.506701.10, TcCLB.507023.120, TcCLB.506405.10, TcCLB.511649.150, TcCLB.510091.8…	126	66	1251	3.61039	8.21858e-07	8.21858e-07	1.32091e-05
m00020 *	Citrate cycle (TCA cycle)	KEGG_PATHWAY	tcr00020:Citrate cycle (TCA cycle)	19	1.45149	1.60602e-09	TcCLB.510105.170, TcCLB.509801.30, TcCLB.510421.320, TcCLB.506195.110, TcCLB.511909.40, TcCLB.507757.70, TcCLB.511575.60, TcCLB.510329.270, TcCLB.509379.10, TcCLB.510797.10, TcCLB.509717.20, TcCLB.506025.60, TcCLB.507883.100, TcCLB.506701.10, TcCLB.507831.70, TcCLB.510091.80, TcCLB.503935.20, TcCLB.507257.60, TcCLB.511277.110	125	38	1251	5.004	9.95731e-08	9.95731e-08	1.62071e-06
m00030	Pentose phosphate pathway	INTERPRO	IPR001951:Histone H4	14	1.64127	2.28078e-14	TcCLB.507601.150, TcCLB.507601.160, TcCLB.508203.29, TcCLB.507943.5, TcCLB.507943.30, TcCLB.507943.10, TcCLB.507943.20, TcCLB.510351.11, TcCLB.508203.20, TcCLB.510351.20, TcCLB.510351.31, TcCLB.508203.38, TcCLB.508203.56, TcCLB.508203.47	477	18	10402	16.9611	1.20853e-11	1.20853e-11	3.30513e-11
m00051 *	Fructose and mannose metabolism	KEGG_PATHWAY	tcr00051:Fructose and mannose metabolism	10	9.52381	3.31537e-13	TcCLB.511717.90, TcCLB.508951.20, TcCLB.510027.10, TcCLB.510121.20, TcCLB.504163.40, TcCLB.510301.10, TcCLB.508647.200, TcCLB.508257.70, TcCLB.504163.50, TcCLB.503589.10	18	21	1251	33.0952	3.64664e-12	3.64664e-12	2.06513e-10
m00071 *	Fatty acid metabolism	KEGG_PATHWAY	tcr00071:Fatty acid metabolism	16	5.97015	1.24887e-17	TcCLB.509153.120, TcCLB.511751.120, TcCLB.509717.90, TcCLB.508185.10, TcCLB.509463.30, TcCLB.509261.30, TcCLB.507023.120, TcCLB.510105.240, TcCLB.507211.10, TcCLB.511581.10, TcCLB.511277.60, TcCLB.506357.50, TcCLB.504089.40, TcCLB.504177.10, TcCLB.508153.130, TcCLB.511277.210	33	32	1251	18.9545	3.74661e-16	3.74661e-16	1.06384e-14
m00100 *	Steroid biosynthesis	GOTERM_BP_FAT	GO:0006694~steroid biosynthetic process	4	1.44404	1.49396e-05	TcCLB.510329.90, TcCLB.510185.10, TcCLB.505683.10, TcCLB.504191.10	66	4	4110	62.2727	0.00265574	0.00265574	0.018366
m00130 *	Ubiquinone and other terpenoid-quinone biosynthesis	KEGG_PATHWAY	tcr00130:Ubiquinone and other terpenoid-quinone biosynthesis	10	3.48432	2.2852e-12	TcCLB.506147.60, TcCLB.511461.20, TcCLB.508535.50, TcCLB.510187.30, TcCLB.508461.30, TcCLB.510187.40, TcCLB.503823.160, TcCLB.510285.60, TcCLB.510795.10, TcCLB.510187.50	30	15	1251	27.8	4.34183e-11	4.34183e-11	1.71261e-09
m00190 **	Oxidative phosphorylation	INTERPRO	IPR001951:Histone H4	14	1.14099	2.1288e-12	TcCLB.507601.150, TcCLB.507601.160, TcCLB.508203.29, TcCLB.507943.5, TcCLB.507943.30, TcCLB.507943.10, TcCLB.507943.20, TcCLB.510351.11, TcCLB.508203.20, TcCLB.510351.20, TcCLB.510351.31, TcCLB.508203.38, TcCLB.508203.56, TcCLB.508203.47	678	18	10402	11.9328	1.44762e-09	1.44762e-09	3.19799e-09
m00230 **	Purine metabolism	INTERPRO	IPR001951:Histone H4	14	0.86741	8.91951e-11	TcCLB.507601.150, TcCLB.507601.160, TcCLB.508203.29, TcCLB.507943.5, TcCLB.507943.30, TcCLB.507943.10, TcCLB.507943.20, TcCLB.510351.11, TcCLB.508203.20, TcCLB.510351.20, TcCLB.510351.31, TcCLB.508203.38, TcCLB.508203.56, TcCLB.508203.47	909	18	10402	8.90038	7.26048e-08	7.26048e-08	1.37227e-07
m00240	Pyrimidine metabolism	INTERPRO	IPR001951:Histone H4	14	1.1336	4.12822e-12	TcCLB.507601.150, TcCLB.507601.160, TcCLB.508203.29, TcCLB.507943.5, TcCLB.507943.30, TcCLB.507943.10, TcCLB.507943.20, TcCLB.510351.11, TcCLB.508203.20, TcCLB.510351.20, TcCLB.510351.31, TcCLB.508203.38, TcCLB.508203.56, TcCLB.508203.47	714	18	10402	11.3312	2.95583e-09	2.95583e-09	6.24449e-09
m00250 **	Alanine, aspartate and glutamate metabolism	PIR_SUPERFAMILY	PIRSF002052:histone H4	11	1.59652	4.02022e-11	TcCLB.510351.11, TcCLB.507601.150, TcCLB.508203.20, TcCLB.507601.160, TcCLB.508203.29, TcCLB.510351.20, TcCLB.510351.31, TcCLB.508203.38, TcCLB.507943.10, TcCLB.508203.47, TcCLB.507943.20	87	17	2350	17.478	3.05537e-09	3.05537e-09	4.23048e-08
m00260 *	Glycine, serine and threonine metabolism	GOTERM_BP_FAT	GO:0006544~glycine metabolic process	5	7.69231	1.07325e-07	TcCLB.509937.150, TcCLB.422507.10, TcCLB.504017.40, TcCLB.510911.50, TcCLB.509163.80	17	13	4110	92.9864	4.29301e-06	4.29301e-06	9.81923e-05
m00270 **	Cysteine and methionine metabolism	INTERPRO	IPR004839:Aminotransferase, class I and II	15	1.19522	4.26481e-11	TcCLB.503453.100, TcCLB.510187.70, TcCLB.510795.10, TcCLB.506529.420, TcCLB.506529.430, TcCLB.510889.140, TcCLB.511461.20, TcCLB.508535.50, TcCLB.510187.30, TcCLB.510565.11, TcCLB.509041.10, TcCLB.510889.120, TcCLB.510187.40, TcCLB.510187.50, TcCLB.503679.10	710	24	10402	9.15669	2.88301e-08	1.44151e-08	6.40156e-08
m00280 *	Valine, leucine and isoleucine degradation	KEGG_PATHWAY	tcr00280:Valine, leucine and isoleucine degradation	21	1.42469	4.0624e-11	TcCLB.508933.20, TcCLB.511751.120, TcCLB.509153.120, TcCLB.509717.90, TcCLB.511469.100, TcCLB.508781.110, TcCLB.508185.10, TcCLB.510303.290, TcCLB.509701.10, TcCLB.506629.220, TcCLB.506301.50, TcCLB.508029.10, TcCLB.511389.150, TcCLB.506635.80, TcCLB.506773.40, TcCLB.507023.120, TcCLB.508799.170, TcCLB.504153.360, TcCLB.507601.70, TcCLB.510351.90, TcCLB.511277.210	141	36	1251	5.17553	2.43744e-09	2.43744e-09	4.07119e-08
m00310 *	Lysine degradation	KEGG_PATHWAY	tcr00310:Lysine degradation	14	14.2857	7.01334e-19	TcCLB.511529.160, TcCLB.511751.120, TcCLB.508185.10, TcCLB.507657.10, TcCLB.507657.20, TcCLB.510717.30, TcCLB.507023.120, TcCLB.510105.240, TcCLB.506337.70, TcCLB.511003.60, TcCLB.503671.10, TcCLB.508153.130, TcCLB.503935.20, TcCLB.511277.210	22	26	1251	30.6189	1.8936e-17	1.8936e-17	5.81043e-16
m00330 *	Arginine and proline metabolism	KEGG_PATHWAY	tcr00330:Arginine and proline metabolism	10	8.62069	7.22434e-13	TcCLB.503855.20, TcCLB.511751.120, TcCLB.507023.120, TcCLB.507875.20, TcCLB.510339.50, TcCLB.510945.70, TcCLB.509067.70, TcCLB.504033.130, TcCLB.511023.10, TcCLB.510337.40	16	26	1251	30.0721	2.23951e-11	2.23951e-11	6.20626e-10
m00350 **	Tyrosine metabolism	INTERPRO	IPR001951:Histone H4	12	2.48963	1.05859e-13	TcCLB.507601.150, TcCLB.508203.20, TcCLB.507601.160, TcCLB.508203.29, TcCLB.510351.20, TcCLB.510351.31, TcCLB.508203.38, TcCLB.507943.30, TcCLB.507943.5, TcCLB.507943.10, TcCLB.508203.47, TcCLB.507943.20	278	18	10402	24.9448	3.4069e-11	3.4069e-11	1.42908e-10
m00380 *	Tryptophan metabolism	KEGG_PATHWAY	tcr00380:Tryptophan metabolism	14	1.90736	1.59981e-10	TcCLB.511529.160, TcCLB.510671.20, TcCLB.509717.90, TcCLB.508185.10, TcCLB.506727.100, TcCLB.510647.30, TcCLB.510717.30, TcCLB.510797.10, TcCLB.506375.60, TcCLB.510105.240, TcCLB.506337.70, TcCLB.510039.40, TcCLB.506375.10, TcCLB.509979.150	77	25	1251	9.09818	7.03916e-09	7.03916e-09	1.49674e-07
m00410 *	beta-Alanine metabolism	KEGG_PATHWAY	tcr00410:beta-Alanine metabolism	11	6.21469	4.70741e-15	TcCLB.511529.160, TcCLB.503855.20, TcCLB.511751.120, TcCLB.507023.120, TcCLB.506401.50, TcCLB.510339.50, TcCLB.509701.10, TcCLB.509605.10, TcCLB.504033.130, TcCLB.511277.210, TcCLB.510337.40	23	17	1251	35.1944	1.30562e-13	1.30562e-13	3.89688e-12
m00450 *	Selenocompound metabolism	KEGG_PATHWAY	tcr00450:Selenoamino acid metabolism	17	2.02381	2.37364e-16	TcCLB.508177.110, TcCLB.508177.120, TcCLB.506905.50, TcCLB.507165.50, TcCLB.510381.10, TcCLB.504003.70, TcCLB.511229.50, TcCLB.508717.36, TcCLB.510515.130, TcCLB.507793.20, TcCLB.511589.200, TcCLB.509247.50, TcCLB.508241.140, TcCLB.511691.10, TcCLB.511691.20, TcCLB.509149.9, TcCLB.508175.360	87	20	1251	12.2224	1.13243e-14	1.13243e-14	2.10942e-13
m00480 *	Glutathione metabolism	KEGG_PATHWAY	tcr00480:Glutathione metabolism	11	47.8261	7.35658e-17	TcCLB.503855.20, TcCLB.507259.10, TcCLB.510339.50, TcCLB.504839.44, TcCLB.509803.40, TcCLB.487507.10, TcCLB.504839.28, TcCLB.509445.10, TcCLB.504033.130, TcCLB.510337.40, TcCLB.511019.99	11	35	1251	35.7429	5.55112e-16	5.55112e-16	4.44089e-14
m00500 *	Starch and sucrose metabolism	KEGG_PATHWAY	tcr00500:Starch and sucrose metabolism	9	1.62749	5.4327e-10	TcCLB.506529.508, TcCLB.510889.221, TcCLB.509715.90, TcCLB.510187.100, TcCLB.510105.100, TcCLB.508637.90, TcCLB.503521.50, TcCLB.506359.60, TcCLB.511911.130	45	12	1251	20.85	2.17308e-08	2.17308e-08	4.9704e-07
m00510 **	N-Glycan biosynthesis	INTERPRO	IPR001951:Histone H4	13	8.07453	4.30953e-21	TcCLB.507601.150, TcCLB.507601.160, TcCLB.508203.29, TcCLB.507943.5, TcCLB.507943.30, TcCLB.507943.20, TcCLB.510351.11, TcCLB.508203.20, TcCLB.510351.20, TcCLB.510351.31, TcCLB.508203.38, TcCLB.508203.56, TcCLB.508203.47	99	18	10402	75.8844	5.73167e-19	5.73167e-19	5.03904e-18
m00520	Amino sugar and nucleotide sugar metabolism	KEGG_PATHWAY	tcr00052:Galactose metabolism	5	1.1655	0.000564325	TcCLB.508465.90, TcCLB.503521.50, TcCLB.506359.60, TcCLB.507001.110, TcCLB.507009.40	36	15	1251	11.5833	0.0179013	0.00899108	0.487696
m00561	Glycerolipid metabolism	INTERPRO	IPR001951:Histone H4	12	3.71517	9.84578e-16	TcCLB.507601.150, TcCLB.508203.20, TcCLB.507601.160, TcCLB.508203.29, TcCLB.510351.20, TcCLB.510351.31, TcCLB.508203.38, TcCLB.507943.30, TcCLB.507943.5, TcCLB.507943.10, TcCLB.508203.47, TcCLB.507943.20	183	18	10402	37.8944	2.498e-13	2.498e-13	1.29896e-12
m00562 *	Inositol phosphate metabolism	KEGG_PATHWAY	tcr00562:Inositol phosphate metabolism	10	16.129	2.09359e-13	TcCLB.510003.30, TcCLB.510879.160, TcCLB.509715.120, TcCLB.508695.20, TcCLB.509179.140, TcCLB.510101.130, TcCLB.504057.104, TcCLB.507047.120, TcCLB.506297.200, TcCLB.510105.130	19	19	1251	34.6537	2.09388e-12	2.09388e-12	1.25733e-10
m00563 *	Glycosylphosphatidylinositol(GPI)-anchor biosynthesis	KEGG_PATHWAY	tcr00563:Glycosylphosphatidylinositol(GPI)-anchor biosynthesis	9	2.24439	1.28805e-12	TcCLB.511655.10, TcCLB.507639.100, TcCLB.509215.16, TcCLB.504005.20, TcCLB.511507.50, TcCLB.503781.20, TcCLB.511481.40, TcCLB.503909.100, TcCLB.508307.100	30	10	1251	37.53	2.83378e-11	2.83378e-11	1.00809e-09
m00564 *	Glycerophospholipid metabolism	KEGG_PATHWAY	tcr00564:Glycerophospholipid metabolism	8	9.63855	1.14096e-11	TcCLB.506713.40, TcCLB.507257.80, TcCLB.503925.80, TcCLB.507949.130, TcCLB.511907.50, TcCLB.511423.70, TcCLB.511151.90, TcCLB.511277.370	14	15	1251	47.6571	1.59735e-10	1.59735e-10	7.75047e-09
m00620 *	Pyruvate metabolism	KEGG_PATHWAY	tcr00620:Pyruvate metabolism	25	4.16667	5.44332e-24	TcCLB.508933.20, TcCLB.510105.170, TcCLB.511367.70, TcCLB.510743.70, TcCLB.510421.320, TcCLB.504427.110, TcCLB.511751.120, TcCLB.506701.10, TcCLB.507023.120, TcCLB.507603.230, TcCLB.510091.80, TcCLB.510659.240, TcCLB.507993.390, TcCLB.507757.70, TcCLB.509331.30, TcCLB.508369.50, TcCLB.511281.60, TcCLB.509379.10, TcCLB.508647.270, TcCLB.509717.20, TcCLB.507883.100, TcCLB.505183.20, TcCLB.506297.19…	63	39	1251	12.7289	2.55836e-22	2.55836e-22	5.17017e-21
m00630	Glyoxylate and dicarboxylate metabolism	GOTERM_BP_FAT	GO:0006732~coenzyme metabolic process	8	6.45161	1.62303e-07	TcCLB.509801.30, TcCLB.508207.240, TcCLB.507883.100, TcCLB.506195.110, TcCLB.505807.180, TcCLB.507017.40, TcCLB.511741.50, TcCLB.511277.110	29	65	4110	17.443	1.24972e-05	1.24972e-05	0.000171239
m00640 *	Propanoate metabolism	KEGG_PATHWAY	tcr00640:Propanoate metabolism	16	2.09424	2.87455e-16	TcCLB.511529.160, TcCLB.504427.110, TcCLB.511751.120, TcCLB.509153.120, TcCLB.506401.50, TcCLB.508185.10, TcCLB.510303.290, TcCLB.509701.10, TcCLB.506727.100, TcCLB.509331.30, TcCLB.508369.50, TcCLB.507767.10, TcCLB.507023.120, TcCLB.509605.10, TcCLB.508153.130, TcCLB.511277.210	75	19	1251	14.0463	1.39888e-14	1.39888e-14	3.10862e-13
m00650	Butanoate metabolism	INTERPRO	IPR001951:Histone H4	11	1.04364	1.23614e-08	TcCLB.510351.11, TcCLB.507601.150, TcCLB.508203.20, TcCLB.507601.160, TcCLB.508203.29, TcCLB.510351.20, TcCLB.510351.31, TcCLB.508203.38, TcCLB.507943.5, TcCLB.508203.47, TcCLB.507943.20	609	18	10402	10.4381	7.46623e-06	7.46623e-06	1.82734e-05
m00670 *	One carbon pool by folate	KEGG_PATHWAY	tcr00670:One carbon pool by folate	7	3.64583	1.17267e-10	TcCLB.509937.150, TcCLB.508207.240, TcCLB.504017.40, TcCLB.510407.90, TcCLB.511231.50, TcCLB.509509.20, TcCLB.511741.50	15	10	1251	58.38	1.99354e-09	1.99354e-09	8.49073e-08
m00785	Lipoic acid metabolism	KEGG_PATHWAY	tcr00780:Biotin metabolism	8	26.6667	1.38083e-15	TcCLB.509749.10, TcCLB.460127.20, TcCLB.507657.10, TcCLB.507657.20, TcCLB.503671.10, TcCLB.508153.60, TcCLB.510431.40, TcCLB.510719.60	10	9	1251	111.2	5.32907e-15	5.32907e-15	5.10703e-13
m00900 *	Terpenoid backbone biosynthesis	KEGG_PATHWAY	tcr00900:Terpenoid backbone biosynthesis	8	15.3846	5.46725e-14	TcCLB.506831.40, TcCLB.508277.140, TcCLB.507913.20, TcCLB.509237.10, TcCLB.511823.70, TcCLB.510431.10, TcCLB.509167.20, TcCLB.507993.330	9	15	1251	74.1333	1.09246e-13	1.09246e-13	1.23346e-11
m00970 *	Aminoacyl-tRNA biosynthesis	KEGG_PATHWAY	tcr00970:Aminoacyl-tRNA biosynthesis	12	3.9604	4.17603e-12	TcCLB.504257.70, TcCLB.510671.20, TcCLB.509937.180, TcCLB.509247.50, TcCLB.508271.10, TcCLB.504137.10, TcCLB.503939.80, TcCLB.510777.20, TcCLB.510647.30, TcCLB.506375.10, TcCLB.506127.30, TcCLB.506375.60	25	36	1251	16.68	8.76959e-11	8.76959e-11	3.22443e-09
m03010 *	Ribosome	SP_PIR_KEYWORDS	ribosomal protein	97	3.37626	8.15762e-15	TcCLB.503635.59, TcCLB.509979.95, TcCLB.508461.480, TcCLB.422921.20, TcCLB.507677.39, TcCLB.508543.30, TcCLB.509775.49, TcCLB.504181.10, TcCLB.511145.20, TcCLB.511621.70, TcCLB.506963.20, TcCLB.506181.50, TcCLB.511621.200, TcCLB.503611.20, TcCLB.510835.40, TcCLB.508175.329, TcCLB.510293.40, TcCLB.506679.150, TcCLB.511237.50, TcCLB.509351.4, TcCLB.510719.30, TcCLB.510323.30, TcCLB.504037.30, TcCLB…	688	277	4205	2.14027	7.21312e-13	7.21312e-13	8.79297e-12
m03018	RNA degradation	INTERPRO	IPR001951:Histone H4	13	0.918728	4.69723e-10	TcCLB.507601.150, TcCLB.507601.160, TcCLB.508203.29, TcCLB.507943.5, TcCLB.507943.30, TcCLB.507943.10, TcCLB.507943.20, TcCLB.510351.11, TcCLB.508203.20, TcCLB.510351.20, TcCLB.510351.31, TcCLB.508203.38, TcCLB.508203.47	800	18	10402	9.39069	3.62157e-07	3.62157e-07	7.17529e-07
m03020 *	RNA polymerase	INTERPRO	IPR012287:Homeodomain-related	8	0.436205	6.83561e-07	TcCLB.506519.110, TcCLB.503821.10, TcCLB.503939.30, TcCLB.509805.180, TcCLB.509453.40, TcCLB.508909.40, TcCLB.509683.24, TcCLB.511881.14	1034	8	10402	10.06	0.000593155	0.000296622	0.00106051
m03030 *	DNA replication	INTERPRO	IPR001951:Histone H4	13	1.24046	8.44194e-12	TcCLB.507601.150, TcCLB.507601.160, TcCLB.508203.29, TcCLB.507943.5, TcCLB.507943.30, TcCLB.507943.10, TcCLB.507943.20, TcCLB.510351.11, TcCLB.508203.20, TcCLB.510351.20, TcCLB.510351.31, TcCLB.508203.38, TcCLB.508203.47	568	18	10402	13.2263	4.8541e-09	4.8541e-09	1.23954e-08
m03040	Spliceosome	INTERPRO	IPR001951:Histone H4	14	0.985915	1.73426e-11	TcCLB.507601.150, TcCLB.507601.160, TcCLB.508203.29, TcCLB.507943.5, TcCLB.507943.30, TcCLB.507943.10, TcCLB.507943.20, TcCLB.510351.11, TcCLB.508203.20, TcCLB.510351.20, TcCLB.510351.31, TcCLB.508203.38, TcCLB.508203.56, TcCLB.508203.47	799	18	10402	10.1257	1.26081e-08	1.26081e-08	2.62863e-08
m03050	Proteasome	INTERPRO	IPR001951:Histone H4	14	1.14286	2.04969e-12	TcCLB.507601.150, TcCLB.507601.160, TcCLB.508203.29, TcCLB.507943.5, TcCLB.507943.30, TcCLB.507943.10, TcCLB.507943.20, TcCLB.510351.11, TcCLB.508203.20, TcCLB.510351.20, TcCLB.510351.31, TcCLB.508203.38, TcCLB.508203.56, TcCLB.508203.47	676	18	10402	11.9681	1.36305e-09	1.36305e-09	3.06983e-09
m03410	Base excision repair	INTERPRO	IPR001951:Histone H4	9	1.60142	2.34214e-08	TcCLB.510351.11, TcCLB.508203.20, TcCLB.508203.29, TcCLB.510351.20, TcCLB.510351.31, TcCLB.508203.38, TcCLB.507943.30, TcCLB.507943.5, TcCLB.508203.47	319	18	10402	16.3041	9.27483e-06	9.27483e-06	3.26205e-05
m03420 **	Nucleotide excision repair	INTERPRO	IPR001951:Histone H4	12	3.26975	6.10662e-15	TcCLB.510351.11, TcCLB.507601.150, TcCLB.508203.20, TcCLB.507601.160, TcCLB.508203.29, TcCLB.510351.20, TcCLB.510351.31, TcCLB.508203.38, TcCLB.507943.30, TcCLB.507943.5, TcCLB.508203.47, TcCLB.507943.20	215	18	10402	32.2543	1.71585e-12	1.71585e-12	8.08242e-12
m03430 **	Mismatch repair	INTERPRO	IPR001951:Histone H4	14	2.4055	3.56243e-16	TcCLB.507601.150, TcCLB.507601.160, TcCLB.508203.29, TcCLB.507943.5, TcCLB.507943.30, TcCLB.507943.10, TcCLB.507943.20, TcCLB.510351.11, TcCLB.508203.20, TcCLB.510351.20, TcCLB.510351.31, TcCLB.508203.38, TcCLB.508203.56, TcCLB.508203.47	347	18	10402	23.3154	1.2923e-13	1.2923e-13	4.66294e-13
m03440 *	Homologous recombination	KEGG_PATHWAY	tcr03440:Homologous recombination	12	28.5714	6.30512e-18	TcCLB.506435.30, TcCLB.505183.40, TcCLB.509099.70, TcCLB.510821.50, TcCLB.508817.50, TcCLB.511589.120, TcCLB.506227.80, TcCLB.508851.170, TcCLB.511847.60, TcCLB.509319.60, TcCLB.506265.30, TcCLB.503801.30	16	23	1251	40.7935	9.45768e-17	9.45768e-17	4.38369e-15
m03450 *	Non-homologous end-joining	KEGG_PATHWAY	tcr03450:Non-homologous end-joining	8	1.5534	8.30762e-08	TcCLB.503643.10, TcCLB.509099.70, TcCLB.511491.50, TcCLB.508799.60, TcCLB.509319.60, TcCLB.506287.200, TcCLB.506773.140, TcCLB.508881.70	47	13	1251	16.3797	3.48919e-06	3.48919e-06	7.68868e-05
m04070	Phosphatidylinositol signaling system	GOTERM_MF_FAT	GO:0003735~structural constituent of ribosome	3	12.5	0.0700699	TcCLB.506413.20, TcCLB.508207.110, TcCLB.511237.50	10	278	5605	6.04856	0.729539	0.729539	41.4617
m04120 **	Ubiquitin mediated proteolysis	INTERPRO	IPR001951:Histone H4	12	3.40909	1.50146e-15	TcCLB.510351.11, TcCLB.507601.150, TcCLB.508203.20, TcCLB.507601.160, TcCLB.510351.20, TcCLB.510351.31, TcCLB.508203.38, TcCLB.507943.30, TcCLB.507943.5, TcCLB.507943.10, TcCLB.508203.47, TcCLB.507943.20	190	18	10402	36.4982	3.65263e-13	3.65263e-13	1.9984e-12
m04130 *	SNARE interactions in vesicular transport	KEGG_PATHWAY	tcr04130:SNARE interactions in vesicular transport	27	3.94161	3.95863e-21	TcCLB.509767.215, TcCLB.511283.40, TcCLB.510647.40, TcCLB.510149.90, TcCLB.510123.70, TcCLB.506929.40, TcCLB.506469.130, TcCLB.507645.30, TcCLB.509153.50, TcCLB.506211.230, TcCLB.508059.40, TcCLB.511287.170, TcCLB.506587.60, TcCLB.507001.70, TcCLB.508479.370, TcCLB.510751.30, TcCLB.506525.40, TcCLB.508955.10, TcCLB.510655.100, TcCLB.471901.20, TcCLB.506989.40, TcCLB.510305.40, TcCLB.508465.120, T…	80	47	1251	8.98324	1.78138e-19	1.78138e-19	3.72283e-18
m04144 *	Endocytosis	KEGG_PATHWAY	tcr04144:Endocytosis	16	8.55615	1.69955e-16	TcCLB.506263.40, TcCLB.506167.50, TcCLB.504175.20, TcCLB.511003.140, TcCLB.506155.50, TcCLB.511001.100, TcCLB.511229.100, TcCLB.508385.60, TcCLB.506337.30, TcCLB.509393.10, TcCLB.506127.150, TcCLB.511211.160, TcCLB.511001.70, TcCLB.507785.10, TcCLB.506957.110, TcCLB.510105.130	32	38	1251	16.4605	5.77316e-15	5.77316e-15	1.77636e-13
m04650	Natural killer cell mediated cytotoxicity	INTERPRO	IPR001951:Histone H4	12	1.33482	5.84495e-11	TcCLB.510351.11, TcCLB.507601.150, TcCLB.508203.20, TcCLB.507601.160, TcCLB.508203.29, TcCLB.510351.20, TcCLB.510351.31, TcCLB.508203.38, TcCLB.507943.5, TcCLB.507943.10, TcCLB.508203.47, TcCLB.507943.20	495	18	10402	14.0094	3.16212e-08	3.16212e-08	8.51021e-08
*, DAVID 1st enrichment
**, DAVID 2nd enrichment
In red, no-enriched targets genes.
