# Supplementary material for: Genome-wide analysis of 3′-untranslated regions supports the existence of post-transcriptional regulons controlling gene expression in trypanosomes
Source: PeerJ. 2013 Jul 30;1:e118. doi: 10.7717/peerj.118 (PMC3728762; doi:10.7717/peerj.118)
Supplement: Table S7 — Table of structured RNA motifs statistically enriched in a given GO dataset. [file peerj-01-118-s017.xls]

## Sheet: TableS7
RNA motif	KEGG group	Motif over-represented in GO groups
m00030	Pentose phosphate pathway	GO_00GO_0003700-seq-sp DB transcription factor act.
m00051	Fructose and mannose metabolism	GO_00GO_0003746-translation elong. factor act. |GO_00GO_0004017-adenylate kinase act. |GO_00GO_0004843-ubiquitin-specific protease act. |GO_00GO_0003677-DNA binding |GO_00GO_0005515-protein binding |GO_00GO_0008415-#N/A |GO_00GO_0015042-trypanothione-disulfide reductase act. |GO_00GO_0051082-unfolded protein binding
m00071	Fatty acid metabolism	GO_0008270-zinc ion binding
m00100	Steroid biosynthesis	GO_0003746-translation elong. factor act. |GO_0004672-protein kinase act. |GO_0008248-pre-mRNA splicing factor act. |GO_0016779-nucleotidyltransferase act.
m00130	Ubiquinone and other terpenoid-quinone biosynthesis	GO_0003774-motor act. |GO_0004784-superoxide dismutase act. |GO_0004843-ubiquitin-specific protease act. |GO_0005509-calcium ion binding |GO_0008483-transaminase act. |GO_0003700-seq-sp DB transcription factor act. |GO_0016787-hydrolase act. |GO_0003735- ribosome
m00190	Oxidative phosphorylation	GO_0004122-cystathionine beta-synthase act. |GO_0004749-ribose phosphate diP-kinase act.
m00230	Purine metabolism	GO_0004017-adenylate kinase act. |GO_0004222-metalloendopep. act.
m00260	Glycine, serine and threonine metabolism	GO_0004840-#N/A |GO_0005515-protein binding
m00270	Cysteine and methionine metabolism	GO_0004017-adenylate kinase act. |GO_0004122-cystathionine beta-synthase act. |GO_0004222-metalloendopep. act.
m00280	Valine, leucine and isoleucine degradation	GO_0004222-metalloendopep. act. |GO_0008270-zinc ion binding
m00310	Lysine degradation	GO_0005515-protein binding |GO_0008237-metallopeptidase act. |GO_0008270-zinc ion binding
m00330	Arginine and proline metabolism	GO_0046873-metal ion transmembrane transporter act.
m00350	Tyrosine metabolism	GO_0003677-DNA binding
m00380	Tryptophan metabolism	GO_0003824-catalytic act. |GO_0000175-3'-5'-XRNAse act. |GO_0004308-exo-a-sialidase act. |GO_0004518-nuclease act. |GO_0004672-protein kinase act. |GO_0004784-superoxide dismutase act. |GO_0008415-#N/A |GO_0008483-transaminase act. |GO_0016779-nucleotidyltransferase act.
m00410	beta-Alanine metabolism	GO_0008270-zinc ion binding |GO_0016491-oxidoreductase act.
m00450	Selenocompound metabolism	GO_0004122-cystathionine beta-synthase act. |GO_0008270-zinc ion binding
m00480	Glutathione metabolism	GO_0005279-#N/A |GO_0005488-binding |GO_0008248-pre-mRNA splicing factor act. |GO_0015042-trypanothione-disulfide reductase act. |GO_0015662-ATPase act., transmemb. mov. Ions |GO_0030508-thiol-disulfide exchange intermediate act. |GO_0042626-ATPase act., transmembrane mov. of substances |GO_0046872-metal ion binding |GO_0046961-H+-tte ATPase act., rot.al mec.
m00500	Starch and sucrose metabolism	GO_0000175-3'-5'-XRNAse act. |GO_0005198-structural molecule act. |GO_0005489-electron transporter act. |GO_0005515-protein binding |GO_0008270-zinc ion binding |GO_0016779-nucleotidyltransferase act.
m00510	N-Glycan biosynthesis	GO_0003777-microtubule motor act. |GO_0004122-cystathionine beta-synthase act. |GO_0004222-metalloendopep. act. |GO_0004518-nuclease act. |GO_0003677-DNA binding |GO_0003678-DNA helic. act. |GO_0008270-zinc ion binding |GO_0008415-#N/A |GO_0008483-transaminase act. |GO_0015071-#N/A |GO_0046873-metal ion transmembrane transporter act.
m00520	Amino sugar and nucleotide sugar metabolism	GO_0004672-protein kinase act.
m00561	Glycerolipid metabolism	GO_0004722-protein ser/thr phosphatase act. |GO_0003677-DNA binding |GO_0008270-zinc ion binding
m00562	Inositol phosphate metabolism	GO_0004672-protein kinase act. |GO_0005200- cytoskeleton |GO_0003677-DNA binding |GO_0005488-binding |GO_0005489-electron transporter act. |GO_0008168-methyltransferase act. |GO_0015042-trypanothione-disulfide reductase act. |GO_0016773-P-transferase act., alcohol group as acceptor |GO_0016787-hydrolase act. |GO_0042626-ATPase act., transmembrane mov. of substances |GO_0046872-metal ion binding |…
m00563	Glycosylphosphatidylinositol(GPI)-anchor biosynthesis	GO_0003774-motor act. |GO_0000175-3'-5'-XRNAse act. |GO_0003969-RNA editase act. |GO_0004784-superoxide dismutase act. |GO_0005515-protein binding |GO_0046872-metal ion binding |GO_0003735- ribosome
m00564	Glycerophospholipid metabolism	GO_0003746-translation elong. factor act. |GO_0003779-actin binding |GO_0004197-cys-type endopep. act. |GO_0004843-ubiquitin-specific protease act. |GO_0003677-DNA binding
m00620	Pyruvate metabolism	GO_0008270-zinc ion binding
m00630	Glyoxylate and dicarboxylate metabolism	GO_0003746-translation elong. factor act. |GO_0004004-ATP-dep. RNA helic. act. |GO_0004722-protein ser/thr phosphatase act.
m00640	Propanoate metabolism	GO_0008270-zinc ion binding
m00650	Butanoate metabolism	GO_0004175-endopep. act. |GO_0008270-zinc ion binding |GO_0003723-RNA binding |GO_0046873-metal ion transmembrane transporter act.
m00670	One carbon pool by folate	GO_0003746-translation elong. factor act. |GO_0003755-PPIase act. |GO_0003887-DNA pol act. |GO_0000175-3'-5'-XRNAse act. |GO_0004175-endopep. act. |GO_0004308-exo-a-sialidase act. |GO_0004365-gapdh (NAD+) (P-rylating) act. |GO_0005489-electron transporter act. |GO_0015036-disulfide oxidoreductase act. |GO_0046872-metal ion binding
m00785	Lipoic acid metabolism	GO_0003910-DNA ligase (ATP) act. |GO_0004768-stearoyl-CoA 9-desaturase act. |GO_0008237-metallopeptidase act.
m00900	Terpenoid backbone biosynthesis	GO_0004784-superoxide dismutase act. |GO_0003678-DNA helic. act. |GO_0008415-#N/A |GO_0003700-seq-sp DB transcription factor act. |GO_0030508-thiol-disulfide exchange intermediate act.
m00910	Nitrogen metabolism	GO_0004835-tubulin-tyrosine ligase act. |GO_0005515-protein binding |GO_0016779-nucleotidyltransferase act.
m00970	Aminoacyl-tRNA biosynthesis	GO_0003746-translation elong. factor act.
m03010	Ribosome	GO_0008270-zinc ion binding |GO_0003735- ribosome
m03020	RNA polymerase	GO_0004017-adenylate kinase act. |GO_0008553-H-exporting ATPase act.
m03030	DNA replication	GO_0004222-metalloendopep. act.
m03040	Spliceosome	GO_0003779-actin binding
m03050	Proteasome	GO_0004122-cystathionine beta-synthase act. |GO_0004175-endopep. act. |GO_0004222-metalloendopep. act. |GO_0008248-pre-mRNA splicing factor act.
m03410	Base excision repair	GO_0003910-DNA ligase (ATP) act. |GO_0004222-metalloendopep. act. |GO_0003677-DNA binding |GO_0008248-pre-mRNA splicing factor act.
m03420	Nucleotide excision repair	GO_0003779-actin binding |GO_0003910-DNA ligase (ATP) act. |GO_0003677-DNA binding |GO_0046873-metal ion transmembrane transporter act.
m03430	Mismatch repair	GO_0003677-DNA binding
m03440	Homologous recombination	GO_0003743-translation initi. factor act. |GO_0003774-motor act. |GO_0003887-DNA pol act. |GO_0005200- cytoskeleton |GO_0003677-DNA binding |GO_0008234-cys-type peptidase act. |GO_0008270-zinc ion binding |GO_0030508-thiol-disulfide exchange intermediate act.
m03450	Non-homologous end-joining	GO_0003677-DNA binding |GO_0008270-zinc ion binding |GO_0016887-ATPase act.
m04070	Phosphatidylinositol signaling system	GO_0008236-ser-type peptidase act.
m04120	Ubiquitin mediated proteolysis	GO_0004842-ubiquitin-protein ligase act. |GO_0003677-DNA binding |GO_0016887-ATPase act.
m04130	SNARE interactions in vesicular transport	GO_0000175-3'-5'-XRNAse act. |GO_0005200- cytoskeleton |GO_0005486-#N/A
m04144	Endocytosis	GO_0003774-motor act. |GO_0008138-protein Tyr/Ser/Thr phosphatase act.
m04650	Natural killer cell mediated cytotoxicity	GO_0004222-metalloendopep. act.
